# Supplementary material for: Characterization of Anti-Phospholipid Antibodies in Lyme Borreliosis Using In-House Developed ELISAs
Source: MDPI journal article supplement (doi:10.3390/antib15030051), 2026-06-22
Supplement: s1 [file antibodies-4331194-supplementary.pdf › antibodies-4331194-supplementary.pdf]

**Supplemental Table S1:** The measurement precision of aCL, aPA, aPC, and aPS (IgG and IgM) ELISAs

|                           | aCL IgG<br>ELISA | aCL IgM<br>ELISA | aPA IgG<br>ELISA | aPA IgM<br>ELISA | aPC IgG<br>ELISA | aPC IgM<br>ELISA | aPS IgG<br>ELISA | aPS IgM<br>ELISA |
|---------------------------|------------------|------------------|------------------|------------------|------------------|------------------|------------------|------------------|
| <i>Within-run CV (%)</i>  | 8.80             | 5.40             | 5.00             | 7.81             | 2.39             | 4.45             | 4.39             | 5.92             |
| <i>Between-run CV (%)</i> | 17.30            | 17.20            | 11.35            | 12.31            | 7.20             | 6.55             | 15.35            | 4.09             |
